# Supplementary material for: Not Drug-like, but Like Drugs: Cnidaria Natural Products
Source: MDPI journal article supplement (doi:10.3390/md20010042), 2021-12-30
Supplement: s1 [file s1]

## SUPPLEMENTARY INFORMATION

**Table S1.** QikProp descriptors and properties generated for molecules.

| Property                 | Description                                                                                                                                                                                                                                                                                         | Range of values in Cnidaria metabolites |
|--------------------------|-----------------------------------------------------------------------------------------------------------------------------------------------------------------------------------------------------------------------------------------------------------------------------------------------------|-----------------------------------------|
| #stars                   | Number of properties falling outside the 95% range of values for known drugs. Based on the following variables MW, dipole, IP, EA, SASA, FOSA, FISA, PISA, WPSA, PSA, volume, #rotor, donorHB, accptHB, glob, QPpolrz, QPlogPC16, QPlogPoct, QPlogPw, QPlogPo/w, logS, QPLogKhsa, QPlogBB, #metabol | 0 to 15                                 |
| #amine                   | Number of non-conjugated amine groups                                                                                                                                                                                                                                                               | 0 to 2                                  |
| #amidine                 | Number of amidine and guanidine groups                                                                                                                                                                                                                                                              | 0 to 2                                  |
| #acid                    | Number of carboxylic acid groups                                                                                                                                                                                                                                                                    | 0 to 2                                  |
| #amide                   | Number of non-conjugated amide groups                                                                                                                                                                                                                                                               | 0 to 6                                  |
| #rotor                   | Number of non-trivial (not CX3), non-hindered (not alkene, amide, small ring) rotatable bonds                                                                                                                                                                                                       | 0 to 46                                 |
| #rtvFG                   | Number of reactive functional groups                                                                                                                                                                                                                                                                | 0 to 10                                 |
| CNS                      | Predicted central nervous system activity on a -2 (inactive) to +2 (active) scale.                                                                                                                                                                                                                  | -2 to 2                                 |
| Mol_MW                   | Molecular weight of molecule                                                                                                                                                                                                                                                                        | 126.1 to 1056.6                         |
| dipole                   | Computed dipole moment of the molecule                                                                                                                                                                                                                                                              | 0 to 22.4                               |
| SASA                     | Total solvent accessible surface area (SASA) in square angstroms using a probe with a 1.4 Å radius                                                                                                                                                                                                  | 306.9 to 1653.7                         |
| FOSA                     | Hydrophobic component of the SASA (saturated carbon and attached hydrogen)                                                                                                                                                                                                                          | 0 to 1502.3                             |
| FISA                     | Hydrophilic component of the SASA (SASA on N, O, and H on heteroatoms)                                                                                                                                                                                                                              | 0 to 421.3                              |
| PISA                     | $\pi$ (carbon and attached hydrogen) component of the SASA                                                                                                                                                                                                                                          | 0 to 383.2                              |
| WPSA                     | Weakly polar component of the SASA (halogens, P, and S)                                                                                                                                                                                                                                             | 0 to 319.6                              |
| Volume                   | Total solvent-accessible volume in cubic angstroms using a probe with a 1.4 Å radius                                                                                                                                                                                                                | 457.5 to 3101.3                         |
| donorHB                  | Estimated number of hydrogen bonds that would be donated by the solute to water molecules in an aqueous solution. Values are averages taken over a number of configurations, so they can be non-integer                                                                                             | 0 to 9.5                                |
| accptHB                  | Estimated number of hydrogen bonds that would be accepted by the solute from water molecules in an aqueous solution.                                                                                                                                                                                | 0 to 25.5                               |
| Dip <sup>2</sup> /V      | Square of the dipole moment divided by the molecular volume. This is the key term in the Kirkwood-Onsager equation for the free energy of solvation of a dipole with volume V                                                                                                                       | 0 to 0.273                              |
| ACxDN <sup>0.5</sup> /SA | Index of cohesive interaction in solids. This term represents the relationship (accptHB.sqrt(donorHB))/(SA)                                                                                                                                                                                         | 0 to 0.074                              |

|                            |                                                                                                                                                                                                                            |                |
|----------------------------|----------------------------------------------------------------------------------------------------------------------------------------------------------------------------------------------------------------------------|----------------|
| glob                       | Globularity descriptor, $(4\pi r^2)/(SASA)$ , where r is the radius of a sphere with a volume equal to the molecular volume. Globularity is 1.0 for a spherical molecule                                                   | 0.607 to 0.997 |
| QPpolrz                    | Predicted polarizability in cubic angstroms                                                                                                                                                                                | 12.2 to 95.8   |
| QPlogPC16                  | Predicted hexadecane/gas partition coefficient.                                                                                                                                                                            | 4.38 to 34.05  |
| QPlogPoct                  | Predicted octanol/gas partition coefficient.                                                                                                                                                                               | 5.9 to 51.4    |
| QPlogPw                    | Predicted water/gas partition coefficient                                                                                                                                                                                  | -1.26 to 32.86 |
| QPlogPo/w                  | Predicted octanol/water partition coefficient                                                                                                                                                                              | -2.03 to 13.55 |
| QPlogS                     | Predicted aqueous solubility, log S. S in mol dm <sup>-3</sup> is the concentration of the solute in a saturated solution that is in equilibrium with the crystalline solid.                                               | -16.13 to 1.33 |
| CIQPlogS                   | Conformation-independent predicted aqueous solubility, log S. S in mol dm <sup>-3</sup> is the concentration of the solute in a saturated solution that is in equilibrium with the crystalline solid                       | -16.13 to 0.27 |
| QPlogHERG                  | Predicted IC <sub>50</sub> value for blockage of HERG K <sup>+</sup> channels                                                                                                                                              | -7.9 to 3.2    |
| QPPCaco                    | Predicted apparent Caco-2 cell permeability in nm/sec. Caco-2 cells are a model for the gut-blood barrier. QikProp predictions are for non-active transport                                                                | 0.092 to 9906  |
| QPlogBB                    | Predicted brain/blood partition coefficient. Note: QikProp predictions are for orally delivered drugs so, for example, dopamine and serotonin are CNS negative because they are too polar to cross the blood-brain barrier | -7.5 to 1.6    |
| QPPMDCK                    | Predicted apparent MDCK cell permeability in nm/sec. MDCK cells are considered to be a good mimic for the blood-brain barrier. QikProp predictions are for non-active transport                                            | 0.07 to 10000  |
| QPlogKp                    | Predicted skin permeability, log K <sub>p</sub>                                                                                                                                                                            | -11.2 to 2.3   |
| IP(ev)                     | PM3 calculated ionization potential                                                                                                                                                                                        | 2.7 to 11.2    |
| EA(eV)                     | PM3 calculated electron affinity                                                                                                                                                                                           | -3.1 to 2.9    |
| #metab                     | Number of likely metabolic reactions.                                                                                                                                                                                      | 0 to 20        |
| QPlogKhsa                  | Prediction of binding to human serum albumin                                                                                                                                                                               | -2.1 to 3.7    |
| HumanOralAbsorption        | Predicted qualitative human oral absorption: 1, 2, or 3 for low, medium, or high. Based on rule-based thresholds in relevant variables                                                                                     | 1 to 3         |
| PercentHumanOralAbsorption | Predicted human oral absorption on 0 to 100% scale. The prediction is based on a quantitative multiple linear regression model.                                                                                            | 0 to 100       |
| SAFluorine                 | Solvent-accessible surface area of fluorine atoms                                                                                                                                                                          | 0 to 0         |
| SAamideO                   | Solvent-accessible surface area of amide oxygen atoms                                                                                                                                                                      | 0 to 73.1      |
| PSA                        | Van der Waals surface area of polar nitrogen and oxygen atoms                                                                                                                                                              | 0 to 317.2     |

|             |                                                                                                                                                                                                                     |             |
|-------------|---------------------------------------------------------------------------------------------------------------------------------------------------------------------------------------------------------------------|-------------|
| #NandO      | Number of nitrogen and oxygen atoms                                                                                                                                                                                 | 0 to 22     |
| RuleOfFive  | Number of violations of Lipinski's rule of five                                                                                                                                                                     | 0 to 4      |
| RuleOfThree | Number of violations of Jorgensen's rule of three                                                                                                                                                                   | 0 to 36     |
| #ringatoms  | Number of atoms in rings                                                                                                                                                                                            | 0 to 10     |
| #in34       | Number of atoms in 3- or 4-membered rings                                                                                                                                                                           | 0 to 32     |
| #in56       | Number of atoms in 5- or 6-membered rings                                                                                                                                                                           | 0 to 26     |
| #noncon     | Number of ring atoms not able to form conjugated aromatic systems                                                                                                                                                   | 9 to 74     |
| #nonHatm    | Number of heavy atoms (nonhydrogen atoms)                                                                                                                                                                           | 0 to 3      |
| Jm          | Predicted maximum transdermal transport rate, $K_p \times MW \times S$ ( $\mu\text{g cm}^{-2} \text{ hr}^{-1}$ ). $K_p$ and $S$ are obtained from the aqueous solubility and skin permeability, QPlogKp and QPlogS. | 0 to 249048 |
